# Supplementary material
Source: PubMed Central journal article supplement (PMC3878091)
Supplement: NIHMS539337-supplement-01.pdf [file NIHMS539337-supplement-01.pdf]

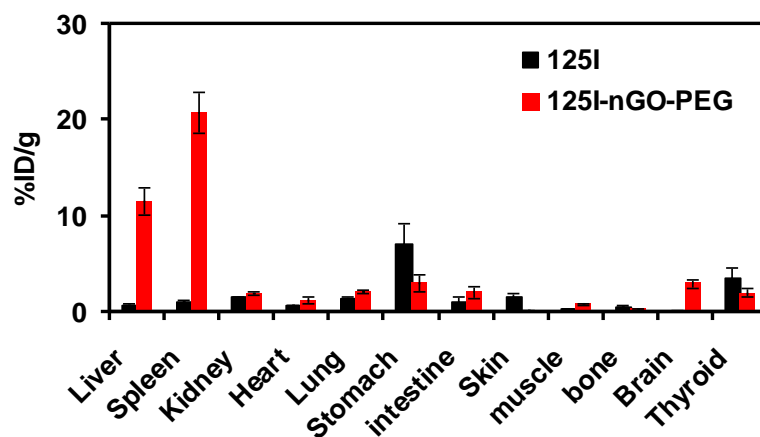

**Supplementary Figure.** Biodistribution of free  $^{125}\text{I}$  and  $^{125}\text{I}$ -nGO-PEG at 6 h post i.v. injection. Minimal uptake of free  $^{125}\text{I}$  was observed in the liver, spleen, as well as most other organs except thyroid and stomach due to the fast renal excretion of small iodine ions<sup>[Ref 33]</sup>.

**Supplementary Table:** Summary in vivo toxicity of different polymer functionalized GO

| <b>In Vivo Toxicity</b>                                                                                                                                                                                    | <b>Ref</b> |
|------------------------------------------------------------------------------------------------------------------------------------------------------------------------------------------------------------|------------|
| <b>Pristine graphene or as-made GO</b>                                                                                                                                                                     |            |
| GO was administered directly into the lungs of mice, and resulted in severe and persistent lung injury.                                                                                                    | 34         |
| GO without surface coating i.v. injected into mice induced inflammation cell infiltration, pulmonary edema, and granuloma formation in the lung of mice (10 mg/kg and 20 mg/kg).                           | 50, 51     |
| <b>Covalent functionalization</b>                                                                                                                                                                          |            |
| PEGylated GO i.v. injected into mice at the dose of 20 mg/kg did not induce obvious toxicity.                                                                                                              | 8, 25, 33  |
| Dextran functionalized GO did not induce appreciable toxicity to mice via i.v. injection (20mg/kg).                                                                                                        | 9          |
| <b>Non-covalent functionalization</b>                                                                                                                                                                      |            |
| Pluronic dispersed GO was administered directly into the lungs of mice (50 µg/mouse), and did not induce obvious pulmonary toxicity.                                                                       | 34         |
| Non-covalently functionalized RGO or nRGO after C18PMH-PEG coating appeared to be non-toxic in vivo to mice via i.v. injection (20mg/kg), intraperitoneal injection(50 mg/kg), or oral feeding (100 mg/ml) | 25, 35     |
